# Supplementary material for: MITF Downregulation Induces Death in Human Mast Cell Leukemia Cells and Impairs IgE-Dependent Degranulation
Source: MDPI journal article supplement (doi:10.3390/ijms24043515), 2023-02-09
Supplement: s1 [file s1]

## MITF downregulation induces death in human mast cell leukemia cells and impairs IgE-dependent degranulation.

Elizabeth Proaño-Pérez , Laia Ollé , Yanru Guo , Cristina Aparicio , Mario Guerrero , Rosa Muñoz-Cano , Margarita Martin

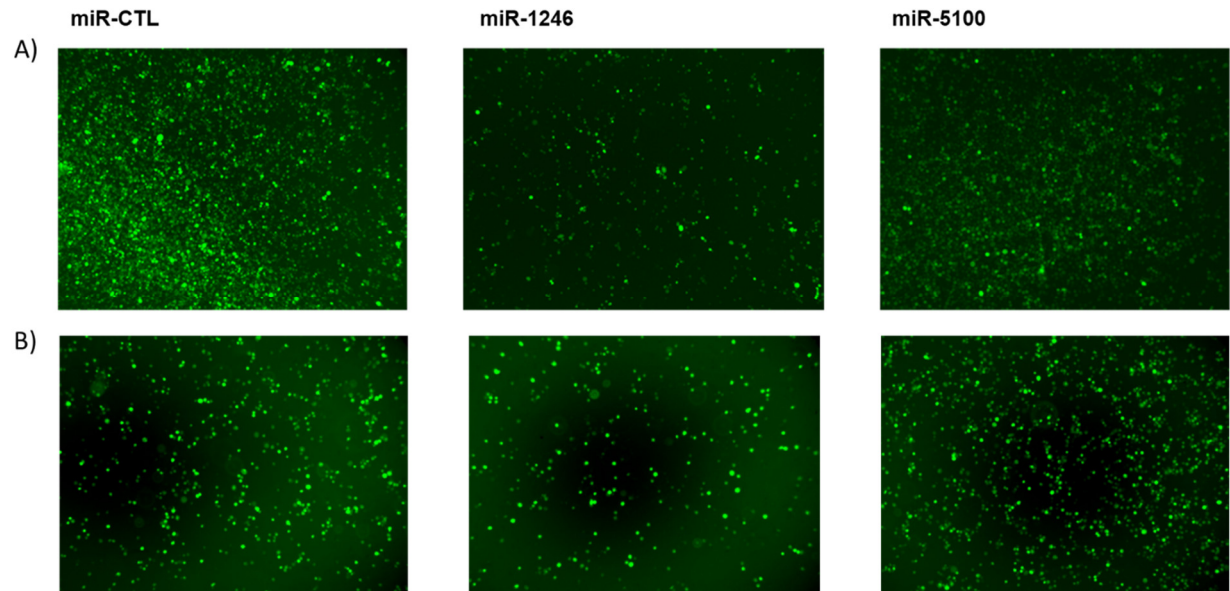

**Figure S1. GFP-miRNAs expression in HMC-1 and LAD2.** GFP expression was corroborated for control lentiviral transduction in both cell lines at 4<sup>th</sup>-day miR-CTL, miR-5100, and miR-1246 were measured by fluorescence microscopy (A) HMC-1 and (B) LAD2 cells.

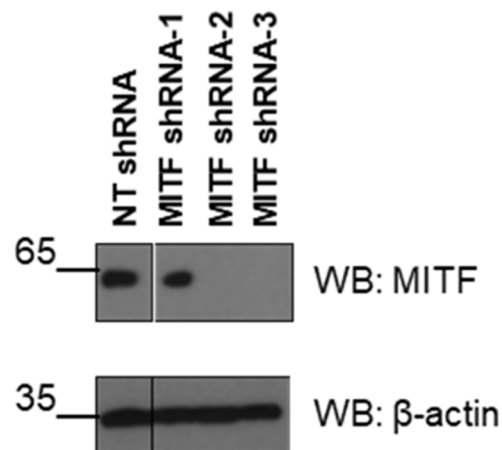

**Figure S2. MITF silencing in HMC-1.** Sequences MITF shRNA-1, MITF shRNA-2, and MITF shRNA-3 were validated in HMC-1 cells. Western blot shows MITF protein expression at 4<sup>th</sup>-day after lentiviral transduction.

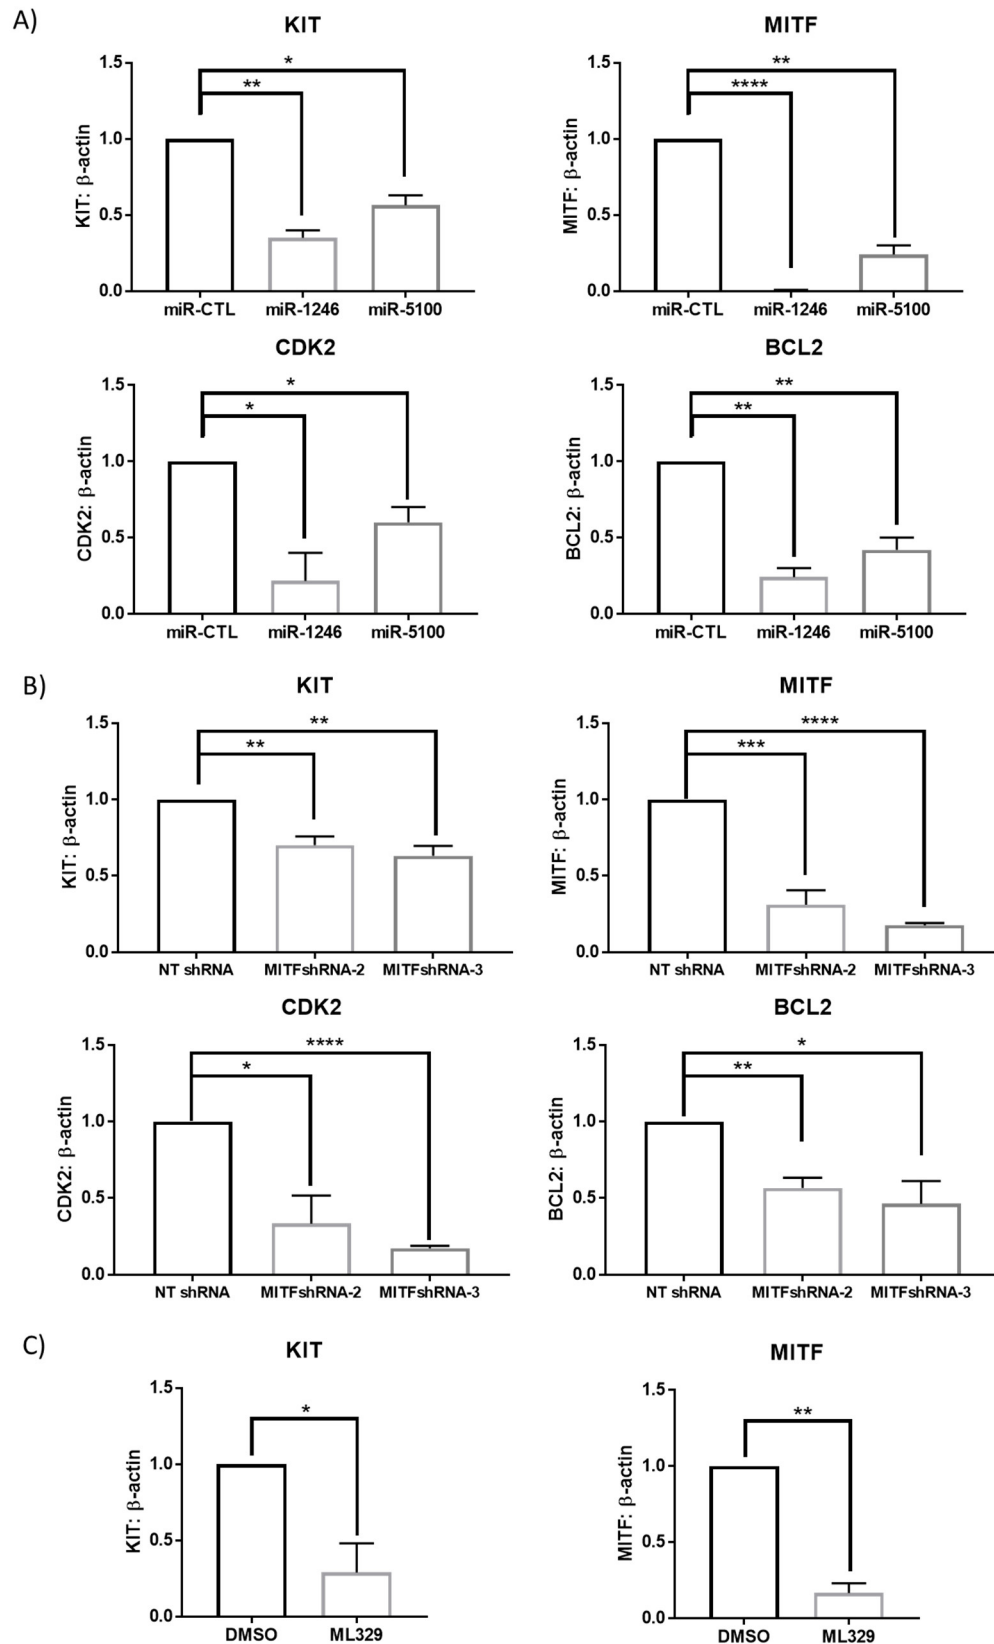

**Figure S3. Band intensities from WB Figure 2A, 3A, and 4A.** Graph depicting quantification of KIT:  $\beta$ -actin, MITF:  $\beta$ -actin, CDK2:  $\beta$ -actin and BCL2:  $\beta$ -actin ratios in the experimental set-up shown in Figure 2 (A); Figure 3 (B), Figure 4 (C). Unpaired T-test; mean  $\pm$ SEM  $n = 3$  independent experiments, (\* $p < 0.05$ , \*\* $p < 0.01$ , \*\*\* $p < 0.001$ , \*\*\*\* $p < 0.0001$ ).
